# Supplementary material
Source: PubMed Central journal article supplement (PMC6545588)
Supplement: NIHMS1023267-supplement-S2.pdf [file NIHMS1023267-supplement-S2.pdf]

**Supplementary Table 2. Rates and rate-reduction of acute gastroenteritis and rotavirus-coded hospitalizations among normal, low and very low birth weight children comparing pre-vaccine years (2001-2006) to post-vaccine years (2008-2015) – January - June**

| 2002-2006 <sup>a</sup>                        |                   | January – June 2008               |                   | January - June 2009               |                   | January - June 2010               |                   | January - June 2011               |                   | January - June 2012               |                   | January - June 2013               |                   | January - June 2014               |                   | January - June 2015               |              |
|-----------------------------------------------|-------------------|-----------------------------------|-------------------|-----------------------------------|-------------------|-----------------------------------|-------------------|-----------------------------------|-------------------|-----------------------------------|-------------------|-----------------------------------|-------------------|-----------------------------------|-------------------|-----------------------------------|--------------|
| Rate (ref) <sup>b</sup>                       | Rate <sup>b</sup> | Rate Red<br>(95% CI) <sup>c</sup> |              |
| <b>Rotavirus-coded hospitalizations</b>       |                   |                                   |                   |                                   |                   |                                   |                   |                                   |                   |                                   |                   |                                   |                   |                                   |                   |                                   |              |
| <i>Normal Birth Weight</i>                    |                   |                                   |                   |                                   |                   |                                   |                   |                                   |                   |                                   |                   |                                   |                   |                                   |                   |                                   |              |
| <1 year <sup>d</sup>                          | 31                | 6                                 | 81 (77, 84)       | 7                                 | 78 (74, 82)       | 1                                 | 96 (94, 97)       | 4                                 | 88 (85, 90)       | 1                                 | 98 (97, 99)       | 3                                 | 90 (87, 92)       | 1                                 | 97 (95, 98)       | 3                                 | 91 (87, 93)  |
| 1 years                                       | 52                | 16                                | 70 (66, 74)       | 14                                | 73 (70, 76)       | 2                                 | 96 (95, 97)       | 8                                 | 85 (83, 87)       | 1                                 | 99 (98, 99)       | 6                                 | 89 (87, 91)       | 1                                 | 99 (98, 99)       | 5                                 | 91 (88, 93)  |
| 2-4 years                                     | 12                | 4                                 | 69 (64, 73)       | 10                                | 19 (11, 26)       | 1                                 | 89 (87, 91)       | 5                                 | 60 (55, 64)       | 0                                 | 97 (95, 98)       | 3                                 | 76 (72, 79)       | 0                                 | 98 (96, 99)       | 2                                 | 84 (80, 88)  |
| <5 years                                      | 23                | 6                                 | 73 (70, 75)       | 10                                | 58 (55, 61)       | 1                                 | 94 (93, 95)       | 5                                 | 78 (77, 80)       | 1                                 | 98 (97, 98)       | 3                                 | 85 (84, 87)       | 1                                 | 98 (97, 98)       | 3                                 | 89 (87, 90)  |
| <i>Low Birth Weight</i>                       |                   |                                   |                   |                                   |                   |                                   |                   |                                   |                   |                                   |                   |                                   |                   |                                   |                   |                                   |              |
| <1 year <sup>d</sup>                          | 52                | 6                                 | 88 (61, 96)       | 6                                 | 89 (65, 97)       | 4                                 | 93 (70, 98)       | 8                                 | 85 (62, 94)       | 3                                 | 95 (78, 99)       | 2                                 | 97 (75, 100)      | 2                                 | 97 (77, 100)      | 2                                 | 95 (67, 99)  |
| 1 years                                       | 121               | 44                                | 63 (7, 85)        | 39                                | 68 (36, 84)       | 8                                 | 93 (71, 98)       | 10                                | 92 (74, 97)       | 3                                 | 98 (83, 100)      | 20                                | 84 (61, 93)       | 0                                 | NA                | 0                                 | NA           |
| 2-4 years                                     | 65                | 0                                 | NA                | 9                                 | 87 (43, 97)       | 0                                 | NA                | 18                                | 71 (33, 88)       | 4                                 | 95 (76, 99)       | 6                                 | 91 (69, 97)       | 2                                 | 97 (80, 100)      | 2                                 | 97 (74, 100) |
| <5 years                                      | 70                | 10                                | 86 (71, 93)       | 15                                | 79 (64, 88)       | 4                                 | 95 (86, 98)       | 12                                | 84 (72, 90)       | 3                                 | 96 (89, 98)       | 7                                 | 90 (80, 95)       | 1                                 | 98 (92, 100)      | 2                                 | 97 (90, 99)  |
| <i>Very Low Birth Weight</i>                  |                   |                                   |                   |                                   |                   |                                   |                   |                                   |                   |                                   |                   |                                   |                   |                                   |                   |                                   |              |
| <1 year <sup>d</sup>                          | 68                | 9                                 | 87 (1, 98)        | 8                                 | 88 (9, 98)        | 16                                | 76 (-4, 95)       | 0                                 | NA                | 0                                 | NA                | 0                                 | NA                | 0                                 | NA                | 10                                | 85 (-16, 98) |
| 1 years                                       | 104               | 72                                | 31 (-225, 85)     | 17                                | 84 (-30, 98)      | 36                                | 65 (-64, 93)      | 0                                 | NA                | 13                                | 87 (-3, 98)       | 57                                | 45 (-83, 83)      | 0                                 | NA                | 0                                 | NA           |
| 2-4 years                                     | 142               | 0                                 | NA                | 0                                 | NA                | 0                                 | NA                | 0                                 | NA                | 9                                 | 94 (51, 99)       | 9                                 | 94 (49, 99)       | 8                                 | 95 (56, 99)       | 11                                | 92 (39, 99)  |
| <5 years                                      | 87                | 16                                | 81 (39, 94)       | 9                                 | 90 (59, 98)       | 16                                | 82 (48, 94)       | 0                                 | NA                | 6                                 | 94 (73, 98)       | 16                                | 81 (52, 93)       | 3                                 | 97 (76, 100)      | 8                                 | 91 (61, 98)  |
| <b>Acute gastroenteritis hospitalizations</b> |                   |                                   |                   |                                   |                   |                                   |                   |                                   |                   |                                   |                   |                                   |                   |                                   |                   |                                   |              |
| <i>Normal Birth Weight</i>                    |                   |                                   |                   |                                   |                   |                                   |                   |                                   |                   |                                   |                   |                                   |                   |                                   |                   |                                   |              |
| <1 year <sup>d</sup>                          | 95                | 58                                | 39 (35, 43)       | 58                                | 39 (35, 42)       | 42                                | 56 (53, 59)       | 46                                | 52 (49, 55)       | 38                                | 60 (58, 63)       | 43                                | 55 (52, 58)       | 33                                | 66 (63, 68)       | 39                                | 60 (56, 63)  |
| 1 years                                       | 139               | 69                                | 51 (47, 54)       | 74                                | 47 (44, 50)       | 42                                | 70 (68, 72)       | 47                                | 66 (64, 68)       | 31                                | 78 (76, 79)       | 40                                | 72 (69, 74)       | 24                                | 82 (81, 84)       | 43                                | 69 (66, 72)  |
| 2-4 years                                     | 43                | 25                                | 42 (38, 45)       | 40                                | 6 (1, 10)         | 19                                | 55 (52, 57)       | 25                                | 40 (37, 43)       | 15                                | 64 (61, 66)       | 22                                | 49 (46, 52)       | 14                                | 67 (65, 69)       | 18                                | 59 (55, 62)  |
| <5 years                                      | 72                | 40                                | 44 (42, 46)       | 50                                | 30 (28, 32)       | 28                                | 61 (59, 62)       | 33                                | 53 (52, 55)       | 23                                | 68 (67, 69)       | 30                                | 59 (57, 60)       | 20                                | 72 (71, 73)       | 27                                | 63 (61, 64)  |
| <i>Low Birth Weight</i>                       |                   |                                   |                   |                                   |                   |                                   |                   |                                   |                   |                                   |                   |                                   |                   |                                   |                   |                                   |              |
| <1 year <sup>d</sup>                          | 191               | 158                               | 17 (-9, 37)       | 141                               | 26 (3, 44)        | 115                               | 40 (19, 55)       | 107                               | 44 (26, 58)       | 102                               | 47 (30, 60)       | 88                                | 54 (37, 67)       | 115                               | 40 (21, 54)       | 94                                | 51 (31, 65)  |
| 1 years                                       | 312               | 196                               | 37 (1, 60)        | 182                               | 42 (18, 59)       | 101                               | 68 (50, 79)       | 114                               | 63 (46, 75)       | 87                                | 72 (58, 81)       | 123                               | 61 (43, 73)       | 61                                | 80 (68, 88)       | 79                                | 75 (59, 84)  |
| 2-4 years                                     | 149               | 49                                | 67 (36, 83)       | 72                                | 52 (14, 73)       | 33                                | 78 (56, 89)       | 99                                | 34 (-3, 57)       | 40                                | 73 (54, 84)       | 56                                | 63 (40, 77)       | 47                                | 69 (49, 81)       | 51                                | 66 (43, 80)  |
| <5 years                                      | 212               | 133                               | 37 (22, 50)       | 135                               | 36 (22, 48)       | 87                                | 59 (48, 67)       | 106                               | 50 (39, 59)       | 77                                | 64 (55, 70)       | 83                                | 61 (51, 68)       | 77                                | 64 (55, 71)       | 73                                | 65 (56, 73)  |
| <i>Very Low Birth Weight</i>                  |                   |                                   |                   |                                   |                   |                                   |                   |                                   |                   |                                   |                   |                                   |                   |                                   |                   |                                   |              |
| <1 year <sup>d</sup>                          | 267               | 257                               | 4 (-50, 38)       | 203                               | 24 (-22, 52)      | 146                               | 45 (7, 68)        | 122                               | 54 (22, 73)       | 151                               | 44 (11, 64)       | 107                               | 60 (28, 78)       | 198                               | 26 (-16, 53)      | 167                               | 38 (-8, 64)  |
| 1 years                                       | 352               | 468                               | -33 (-158, 31)    | 271                               | 23 (-43, 59)      | 200                               | 43 (-14, 72)      | 119                               | 66 (25, 85)       | 162                               | 54 (9, 77)        | 272                               | 23 (-39, 57)      | 93                                | 74 (40, 89)       | 196                               | 44 (-12, 72) |
| 2-4 years                                     | 244               | 22                                | 91 (30, 99)       | 38                                | 84 (30, 96)       | 55                                | 77 (30, 93)       | 141                               | 42 (-27, 74)      | 69                                | 72 (31, 88)       | 116                               | 52 (-4, 78)       | 115                               | 53 (-1, 78)       | 107                               | 56 (-2, 81)  |
| <5 years                                      | 283               | 232                               | 18 (-17, 43)      | 184                               | 35 (7, 55)        | 132                               | 53 (31, 69)       | 127                               | 55 (35, 69)       | 127                               | 55 (36, 68)       | 147                               | 48 (26, 63)       | 144                               | 49 (28, 64)       | 151                               | 47 (22, 63)  |

Red, reduction; CI, confidence interval; PY, person-year; ref., reference group; NA, not applicable

<sup>a</sup> For 2002-2006, we reported the average annual rates.

<sup>b</sup> Rates are reported as n/10,000 PY.

<sup>c</sup> Rate reductions were not reported due to small number of events.

<sup>d</sup> Infants <1 year of age were restricted to those who were vaccine eligible (i.e. 3-11 months).
